# Supplementary material for: LOXL2-dependent deacetylation of aldolase A induces metabolic reprogramming and tumor progression
Source: PubMed Central journal article supplement (PMC9547286; doi:10.1016/j.redox.2022.102496), 2022-10-03
Supplement: mmc2.pdf [file mmc2.pdf]

# Figure S1

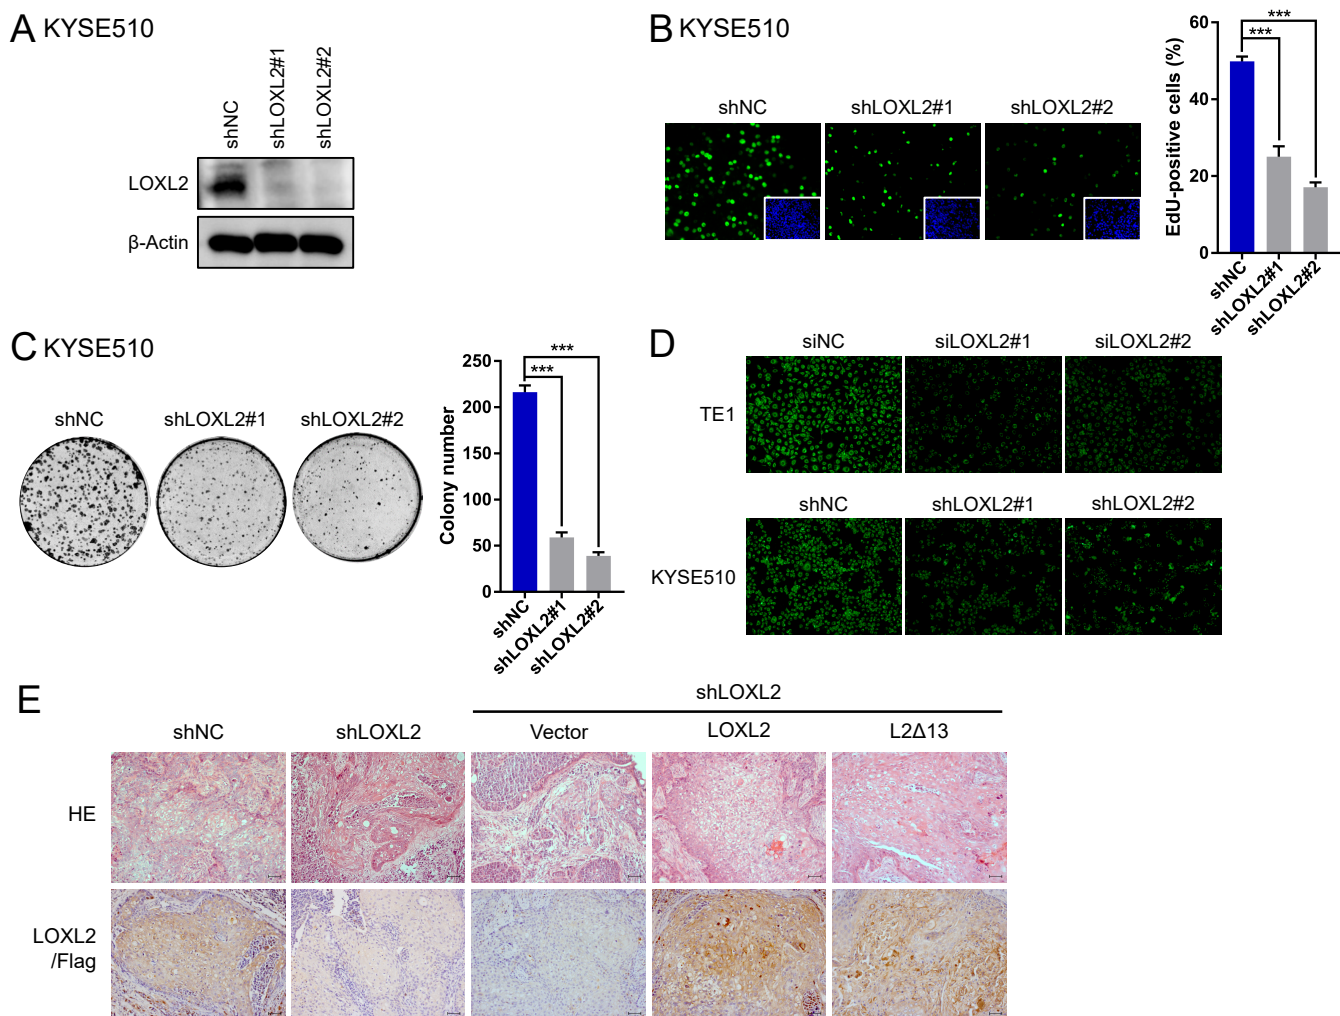

**Figure S1. L2Δ13 and LOXL2 promote tumor cell proliferation *in vitro* and *in vivo*.**

(A-C) Western blotting (A), EdU (B) and colony formation (C) assays with esophageal cancer KYSE510 cells following LOXL2 knockdown with a specific shRNA target. Error bars indicate mean  $\pm$  SD of three replicates. \*\*\* $P < 0.001$  by *t*-test analysis. (D) Effects of LOXL2 silencing on lipid droplets in TE1 and KYSE510 cells. (E) Representative paraffin sections stained with hematoxylin and eosin (H&E, top) and antibodies against LOXL2 or Flag (bottom) for tumors derived from the xenografts. LOXL2 antibody was used for the section from xenografts implanted with KYSE510 cells expressing either a scrambled (shNC) or LOXL2-silencing lentiviral vector (shLOXL2), while the Flag antibody was adopted for the remaining three groups. Scale bar, 50  $\mu$ m.

Figure S2

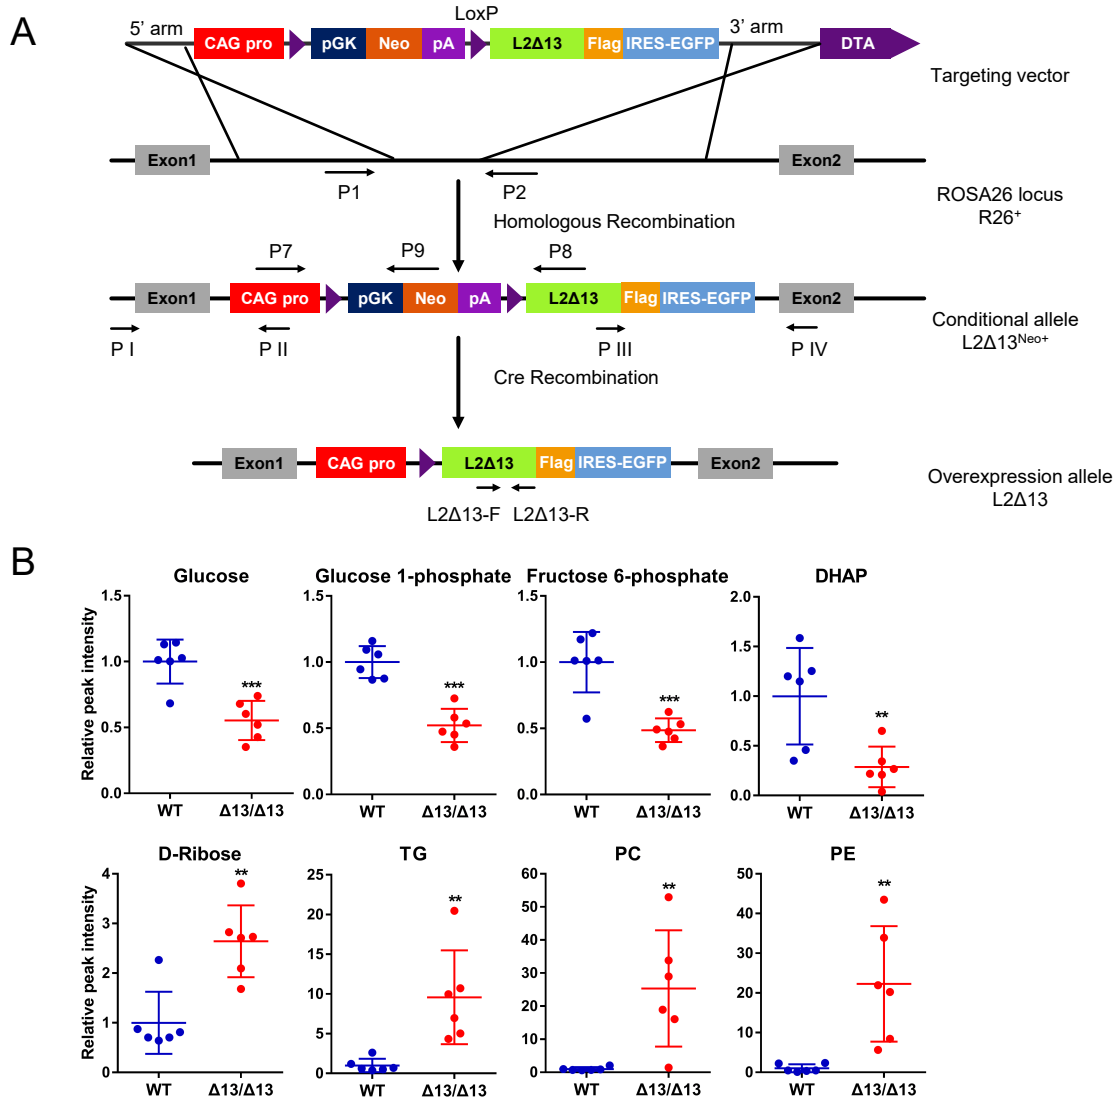

**Figure S2. Generation and comparison of  $L2\Delta13$ -overexpressing transgenic mice and control wild-type mice.**

(A) Schematic diagram illustrating different *ROSA26* allele variants used in the study. The targeting vector contains a *PGK-neomycin-polyA* element flanked by *LoxP* sites, and the human *L2Δ13* cDNA sequence fuses to the 3X Flag sequence and the *IRES-EGFP* reporter gene. An  $L2\Delta13^{Neo^+}$  allele is initially generated by homologous recombination. The *PGK-neomycin-polyA* is removed upon Cre-mediated excision, then the *L2Δ13/Flag* is expressed under the control of the CAG promoter (*L2Δ13* allele). Primer pairs for PCR analysis are listed in *Supplementary Table S4*. (B) Representation of the downregulated glycolysis/gluconeogenesis pathways (top) and the upregulated pentose phosphate and fatty acid metabolism pathways (bottom) and relative MS peak intensity of their corresponding intermediate metabolites. \*\* $P < 0.01$ ; \*\*\* $P < 0.001$ .  $P$ -value was calculated using a  $t$ -test. DHAP, dihydroxyacetone phosphate; TG, triglyceride; PC, phosphatidyl choline; PE phosphatidyl ethanolamine.

## Figure S3

### A SHEE

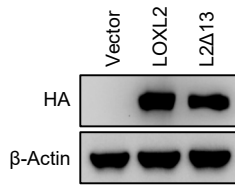

### B

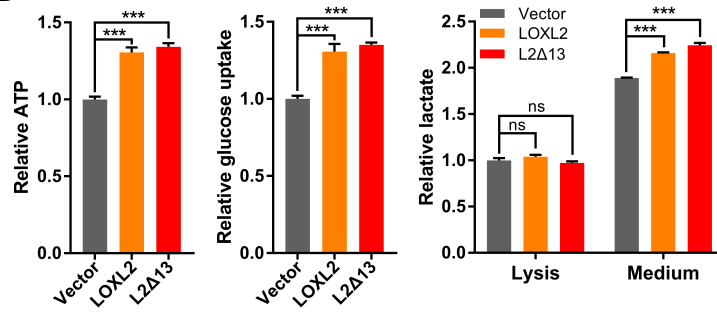

### C KYSE510

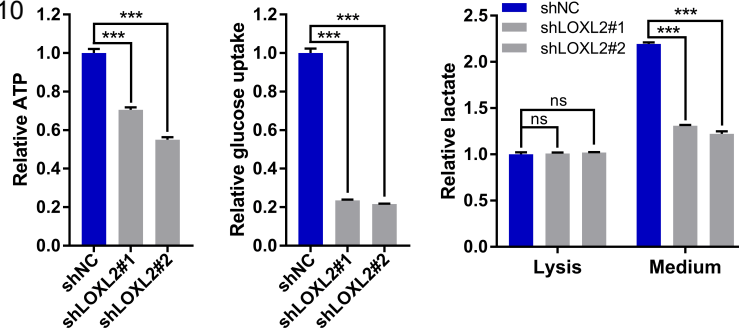

## Figure S3. LOXL2 and L2Δ13 enhance glycolysis.

(A) Western blotting assays of nonmalignant esophageal epithelial cells expressing the empty vector, full-length LOXL2 or L2Δ13 variant. (B and C) Levels of ATP, glucose uptake and lactate of nonmalignant esophageal epithelial cells expressing recombinant full-length LOXL2, L2Δ13 variant or control vector (B) and esophageal cancer cells following LOXL2 silencing by specific shRNA (C). Data show the mean ± SD (n = 3 or 4). \*\*\* $P < 0.001$  by the  $t$ -test. ns, not significant.

Figure S4

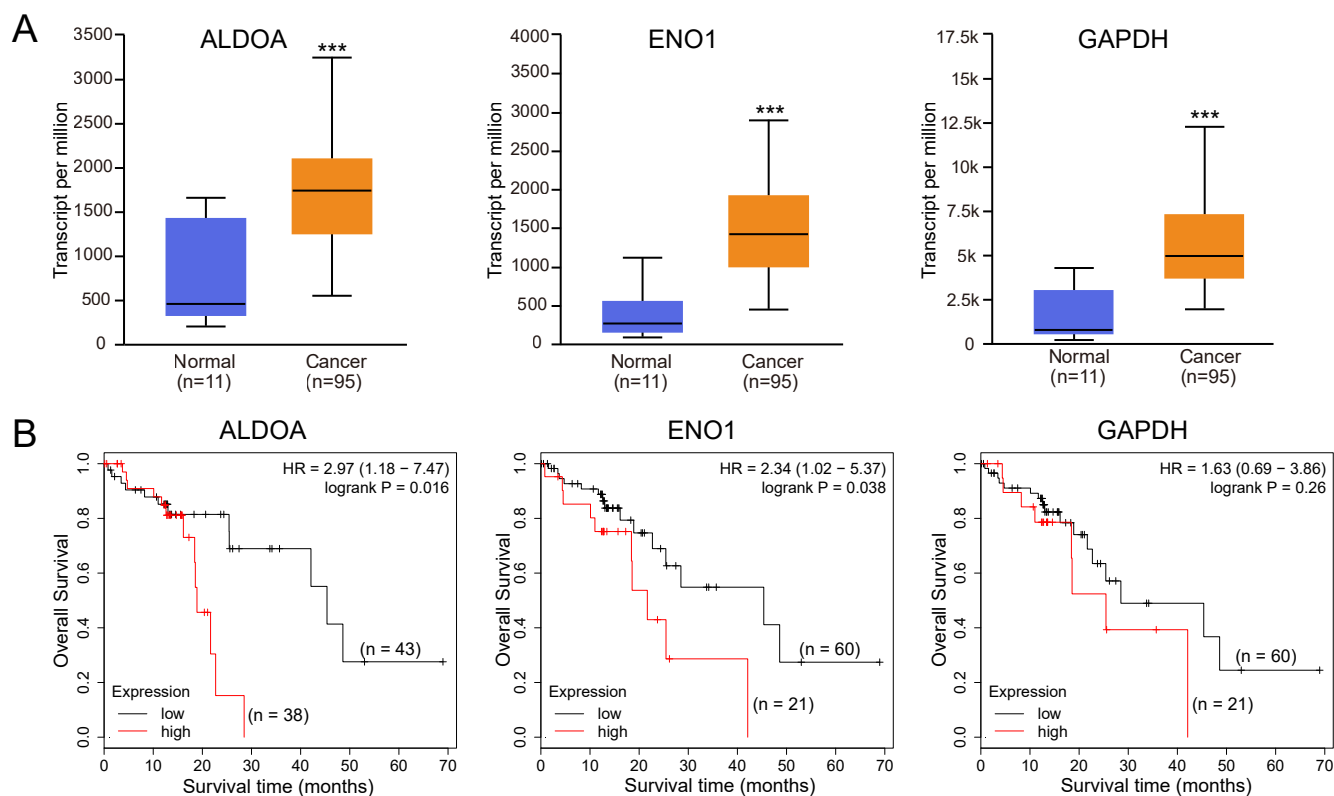

**Figure S4. ALDOA, ENO1 and GAPDH predict poor clinical outcome in esophageal cancer patients.**

**(A)** RNA-sequencing data of gene expressions of ALDOA, ENO1 and GAPDH from TCGA database in esophageal cancer ( $n = 95$ ) and normal esophagus ( $n = 11$ ).  $***P < 0.001$  by the  $t$ -test. **(B)** Kaplan-Meier estimates overall survival of patients with esophageal cancer according to curves of ALDOA, ENO1 and GAPDH ( $n = 81$ ; Kaplan-Meier Plotter database, <http://kmplot.com/analysis/>). High expression levels of these glycolic genes were associated with shorter medium survival time in patients with esophageal cancer. Statistical significance was assessed by log-rank test. HR, hazard ratio (95% CI).

## Figure S5

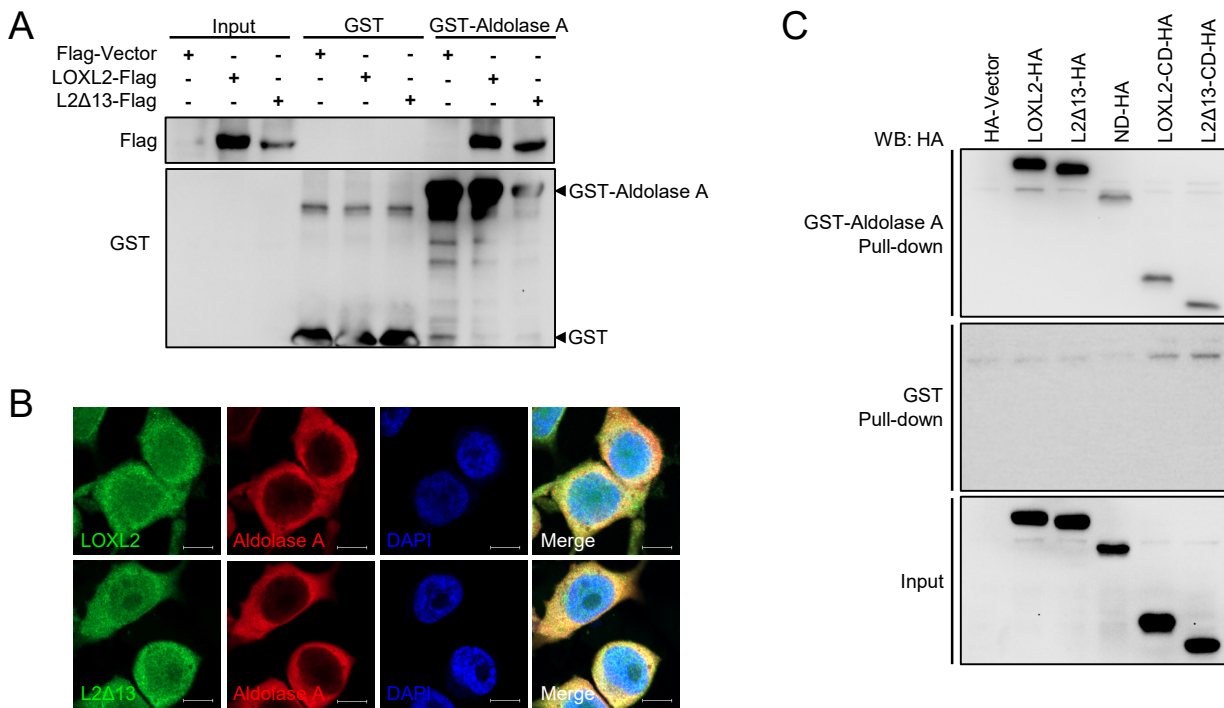

### Figure S5. LOXL2 and L2Δ13 directly interact with aldolase A.

**(A)** GST-aldolase A and GST were retained on glutathione resins, incubated with whole cell lysates extracted from HEK293T cells transfected with LOXL2-Flag, L2Δ13-Flag or Flag empty vector, and then subjected to western blotting as indicated. **(B)** Confocal immunofluorescence staining indicate co-localization of either LOXL2 or L2Δ13 with aldolase A in KYSE510 cells that express these proteins endogenously. Shown are individual views of LOXL2/L2Δ13 (green), aldolase A (red) and nucleus (blue), and merged images showing triple staining. Scale bar, 10 μm. **(C)** Pull-down assay in which either GST-tagged aldolase A or control GST was used to pull down different HA-tagged deletion mutants of full-length LOXL2 and L2Δ13 in whole cell lysate from HEK293T cells expressing each of these mutants

## Figure S6

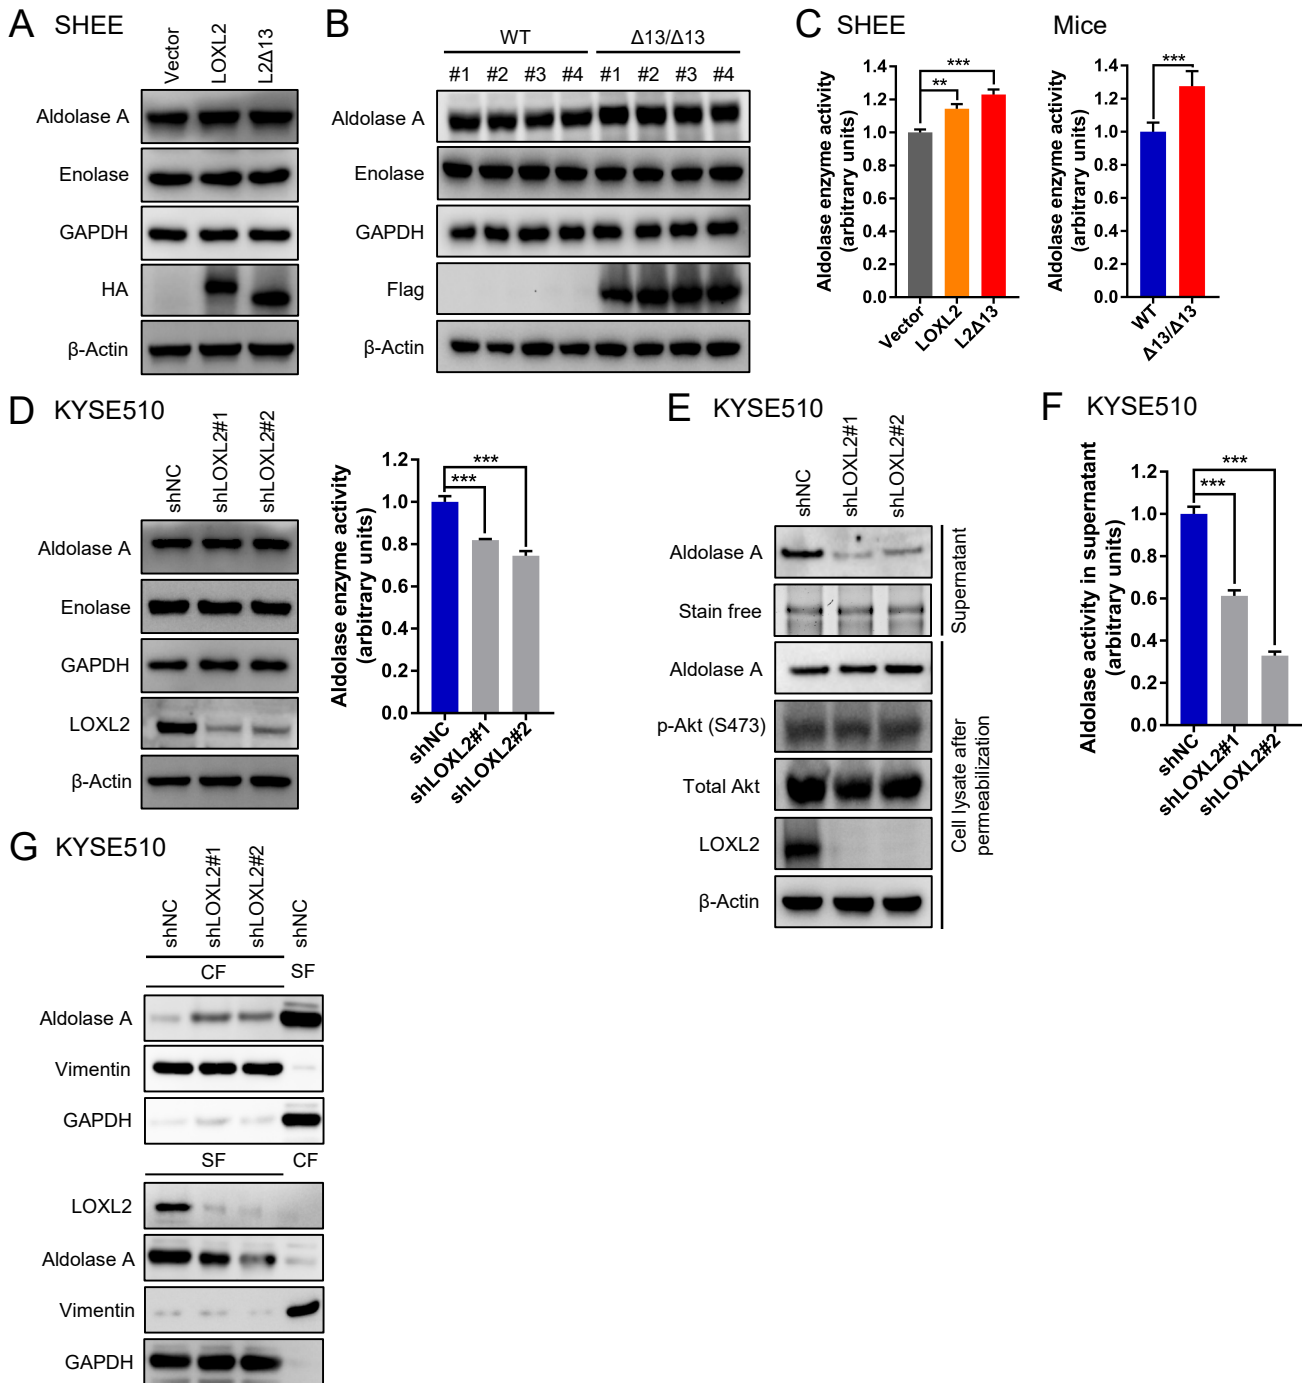

### Figure S6. Depletion of LOXL2 inhibits the mobilization and enzymatic activity of aldolase A.

(A) Western blotting analysis of nonmalignant esophageal epithelial SHEE cells expressing HA-tagged LOXL2, HA-tagged L2Δ13 or the empty vector. (B) Immunoblotting detection of wild-type and homozygous L2Δ13-overexpressing mice (n = 4). (C) Aldolase enzyme activity analysis of SHEE cells overexpressing LOXL2 or L2Δ13 (left; n = 3), wild-type and L2Δ13-overexpressing mice (right; n = 4). Data show means ± SD, \*\*\**P* < 0.001. (D) Western blotting (left) and aldolase activity determination (right) of KYSE510 esophageal cancer cells upon depletion of LOXL2. (E) KYSE510 cells were permeabilized with digitonin (30 μg/mL) for 5 min. Supernatant and cell lysate were subjected to immunoblotting. (F) Quantification of aldolase activity in the supernatant by immunoblotting of cells from (E). Means ± SD, n = 3. \*\*\**P* < 0.001 by the *t*-test. (G) KYSE510 cells following depletion of LOXL2 were lysed and fractionated. Vimentin served as a marker for the cytoskeletal fraction (CF) and GAPDH for the soluble fraction (SF). Fractions from the cells transfected with scrambled shRNA are controls for the fractionation procedure.

# Figure S7

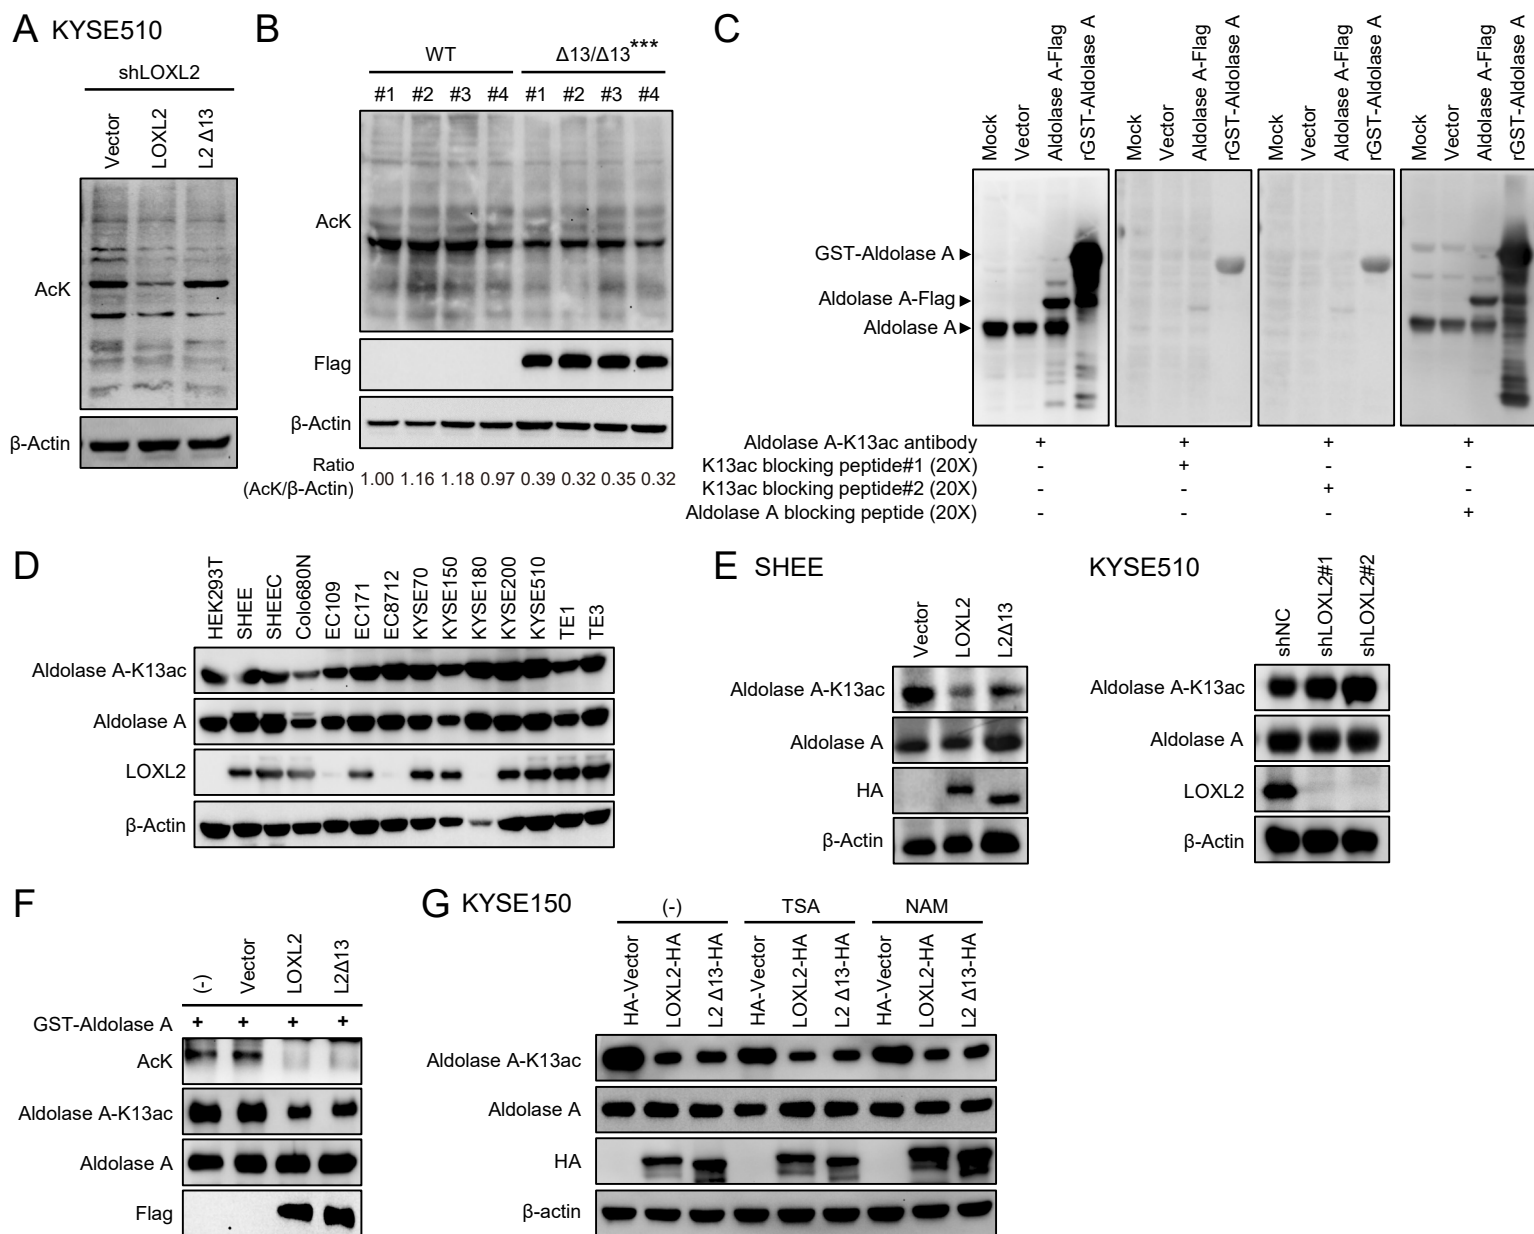

**Figure S7. LOXL2 and L2Δ13 catalyze deacetylation of aldolase A-K13.**

(A) Acetylation level of total proteins from whole cell lysates of stably LOXL2silenced KYSE510 cells following LOXL2/L2Δ13 re-expression by Western blotting with anti -acetyl-Lys antibody. (B) Acetylation level of total proteins from livers of wild-type and L2Δ13-overexpressing mice. Ratios of AcK/β-actin between two groups were quantifiably analyzed by *t*-test, \*\*\**P* < 0.001. (C) Specificity of antibody directed against the acetylation of aldolase A-K13 was detected by Western blotting in untreated HEK293T cells, HEK293T cells expressing Flag-tagged aldolase A or Flag-tagged empty vector and purified recombinant GST-aldolase A from bacteria. Positive staining of aldolase A-K13ac was strongly blocked by indicated matching blocking peptides (#1 and #2) to the aldolase A-K13ac antibody, but not by the peptide to the total aldolase A antibody. (D) The expression levels of aldolase A-K13ac, total aldolase A and full-length LOXL2 in nonmalignant cells (HEK293T and SHEE) and different types of esophageal cancer cells. (E) Western blotting analysis of aldolase A acetylated at K13 (aldolase A-K13ac) and total aldolase A in SHEE cells expressing HA-tagged LOXL2 or HA-tagged L2Δ13 and KYSE510 cells silenced for LOXL2 expression. (F) Flag-tagged LOXL2, L2Δ13 and empty vector proteins were purified from HEK293T transfectants using Flag antibody, and then incubated with GST-aldolase A purified from bacteria in the LOXL2/L2Δ13 reaction buffer for in vitro deacetylase activity assay. (G) KYSE150 cells were transfected with the indicated plasmids and treated with or without traditional histone deacetylase inhibitors, including trichostatin A (TSA) and nicotinamide (NAM).

Figure S8

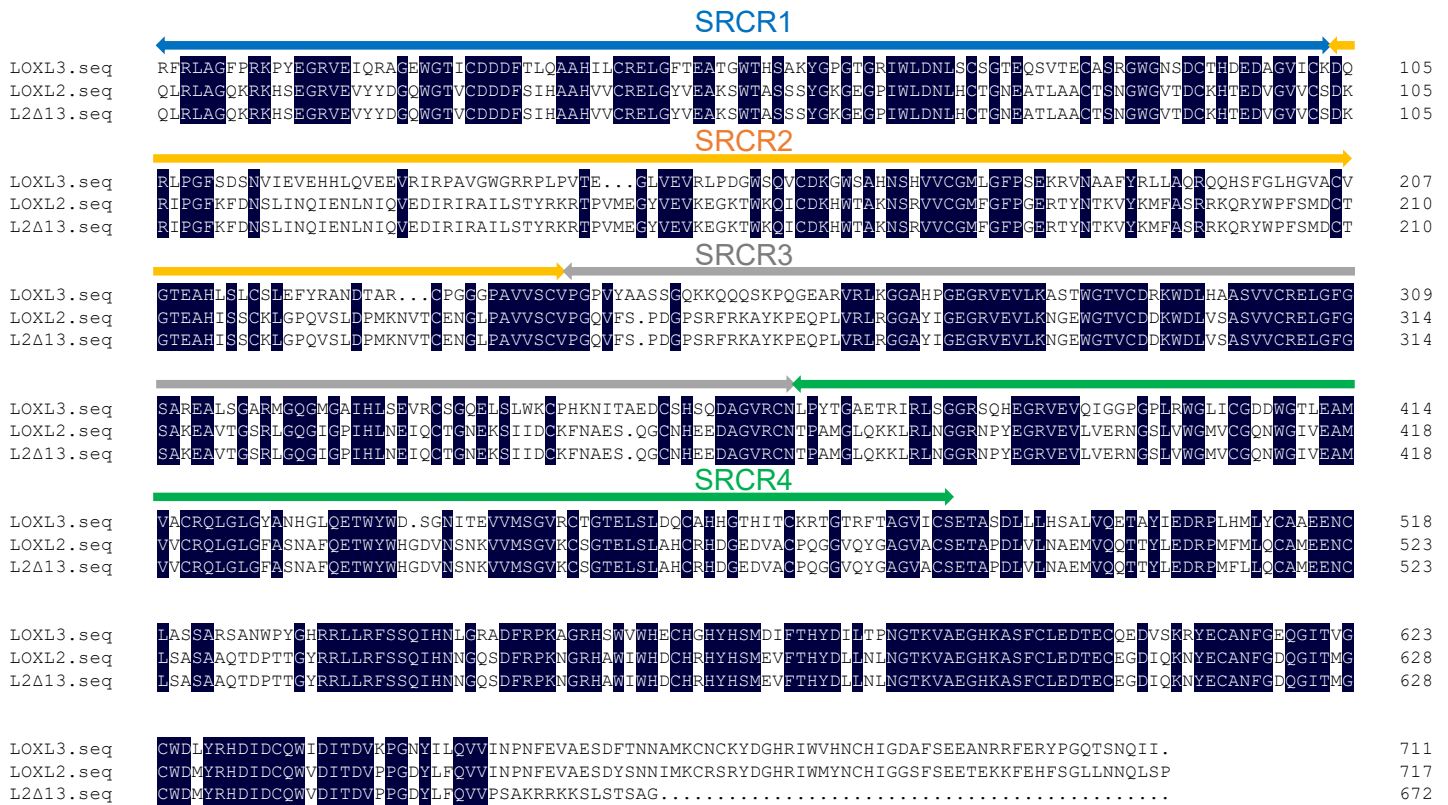

Figure S8. Sequence alignment among LOXL3, LOXL2 and L2Δ13.

Amino acid sequence alignment among LOXL3, LOXL2 and L2Δ13 for their N-terminal scavenger receptor cysteine-rich (SRCR) repeats and C-terminal domain.
